# Supplementary material for: A Vibrio cholerae viral satellite maximizes its spread and inhibits phage by remodeling hijacked phage coat proteins into small capsids
Source: eLife. 2024 Jan 11;12:RP87611. doi: 10.7554/eLife.87611 (PMC10945586; doi:10.7554/eLife.87611)
Supplement: Figure 1—source data 1. [file elife-87611-fig1-data1.xlsx]

## Sheet: 1E
Efficiency of Plaquing
WT	Escape1	Escape2
0.0123	0.354	0.497
0.00994	1.51	0.62
0.0116	0.418	0.472
