# Supplementary material for: A Vibrio cholerae viral satellite maximizes its spread and inhibits phage by remodeling hijacked phage coat proteins into small capsids
Source: eLife. 2024 Jan 11;12:RP87611. doi: 10.7554/eLife.87611 (PMC10945586; doi:10.7554/eLife.87611)
Supplement: Figure 2—source data 1. [file elife-87611-fig2-data1.xlsx]

## Sheet: 2D
Efficiency of Transduction
PLE + EV	PLE∆orf17 + EV	PLE∆orf17 + porf17
100	4.09	31.58
100	3.19	54.08
100	6.47	72.23
