# Supplementary material for: A Vibrio cholerae viral satellite maximizes its spread and inhibits phage by remodeling hijacked phage coat proteins into small capsids
Source: eLife. 2024 Jan 11;12:RP87611. doi: 10.7554/eLife.87611 (PMC10945586; doi:10.7554/eLife.87611)
Supplement: Figure 3—figure supplement 1—source data 1. [file elife-87611-fig3-figsupp1-data1.xlsx]

## Sheet: Diameter
particle type	particle number	diameter (nm)	roundness (l/w)	average diameter (nm)
coat	1	91.1195	1.27152	103.49
coat	1	115.86
coat	2	66.3272	1.00035	66.3389
coat	2	66.3506
coat	3	109.07	1.20367	120.177
coat	3	131.284
coat	4	53.7593	1.02346	54.3899
coat	4	55.0205
coat	5	43.5529	1.13412	46.4736
coat	5	49.3942
coat	6	59.0625	1.18903	64.6449
coat	6	70.2272
coat	7	94.5072	1.33674	110.419
coat	7	126.331
coat	8	70.2272	1.022	70.9998
coat	8	71.7725
coat	9	79.2047	1.37373	94.0053
coat	9	108.806
coat	10	67.1576	1.0621	69.2429
coat	10	71.3283
coat	11	87.3296	1.09613	91.5271
coat	11	95.7246
coat	12	49.3219	1.34893	57.9269
coat	12	66.5319
coat	13	73.429	1.01856	74.1104
coat	13	74.7918
coat	14	54.9583	1.3757	65.2822
coat	14	75.6061
coat	15	39.3048	1.52565	49.6351
coat	15	59.9655
coat	16	36.5056	1.17463	39.693
coat	16	42.8805
coat	17	68.6454	1.08236	71.4722
coat	17	74.299
coat	18	46.7948	1.27856	53.3123
coat	18	59.8297
coat	19	70.9697	1.05078	72.7715
coat	19	74.5733
coat	20	93.2953	1.07459	96.7749
coat	20	100.255
coat	21	90.1018	1.32007	104.521
coat	21	118.94
coat	22	82.1268	1.03436	83.5379
coat	22	84.9489
coat	23	81.9775	1.07381	85.0028
coat	23	88.0282
coat	24	56.7126	1.03369	57.668
coat	24	58.6233
coat	25	66.4554	1.13688	71.0036
coat	25	75.5518
coat	26	69.1047	1.07497	71.695
coat	26	74.2854
coat	27	64.7283	1.09576	67.8276
coat	27	70.9268
coat	28	63.7912	1.07166	66.0769
coat	28	68.3626
coat	29	38.4655	1.08468	40.0941
coat	29	41.7227
coat	30	62.6619	1.34644	73.5161
coat	30	84.3704
coat	31	61.4447	1.36699	72.7197
coat	31	83.9946
coat	32	54.9769	1.50196	68.7751
coat	32	82.5732
coat	33	54.9769	1.02369	55.628
coat	33	56.279
coat	34	41.2305	1.28573	47.1209
coat	34	53.0112
coat	35	66.9597	1.15386	72.1108
coat	35	77.2618
coat	36	37.8234	1.63065	49.7501
coat	36	61.6769
coat	37	81.2275	1.0461	83.1
coat	37	84.9725
coat	38	74.2854	1.07761	77.1679
coat	38	80.0504
coat	39	63.4383	1.00633	63.639
coat	39	63.8397
coat	40	103.746	1.06305	107.016
coat	40	110.287
coat	41	97.7289	1.16373	105.73
coat	41	113.73
coat	42	69.7661	1.17647	75.9218
coat	42	82.0775
coat	43	55.6405	1.01732	56.1223
coat	43	56.604
coat	44	65.0583	1.37935	77.3982
coat	44	89.7382
coat	45	79.9611	1.20987	88.3518
coat	45	96.7424
coat	46	91.6289	1.4191	110.83
coat	46	130.031
coat	47	55.5676	1.24095	62.2622
coat	47	68.9568
coat	48	73.5397	1.26849	83.4121
coat	48	93.2846
coat	49	92.6917	1.26959	105.186
coat	49	117.681
coat	50	74.244	1.33655	86.7375
coat	50	99.231
coatR223H	1	61.445	1.01049	61.7671
coatR223H	1	62.0893
coatR223H	2	58.6236	1.1265	62.3314
coatR223H	2	66.0393
coatR223H	3	83.1157	1.1209	88.14
coatR223H	3	93.1643
coatR223H	4	40.4064	1.05118	41.4404
coatR223H	4	42.4743
coatR223H	5	61.9743	1.04164	63.2646
coatR223H	5	64.555
coatR223H	6	44.835	1.1828	48.9329
coatR223H	6	53.0307
coatR223H	7	61.495	1.18477	67.1761
coatR223H	7	72.8571
coatR223H	8	86.8729	1.1175	91.9764
coatR223H	8	97.08
coatR223H	9	37.8236	1.06829	39.115
coatR223H	9	40.4064
coatR223H	10	63.7914	1.19888	70.135
coatR223H	10	76.4786
coatR223H	11	56.225	1.29581	64.5411
coatR223H	11	72.8571
coatR223H	12	50.4871	1.09223	52.8154
coatR223H	12	55.1436
coatR223H	13	71.1707	1.28526	81.3218
coatR223H	13	91.4729
coatR223H	14	73.1786	1.00778	73.4632
coatR223H	14	73.7479
coatR223H	15	70.6821	1.16963	76.6771
coatR223H	15	82.6721
coatR223H	16	87.5636	1.28897	100.215
coatR223H	16	112.866
coatR223H	17	58.1521	1.16786	63.0329
coatR223H	17	67.9136
coatR223H	18	83.8971	1.21004	92.7082
coatR223H	18	101.519
coatR223H	19	75.7679	1.06341	78.17
coatR223H	19	80.5721
coatR223H	20	88.5829	1.09675	92.8682
coatR223H	20	97.1536
coatR223H	21	40.0257	1.107	42.1671
coatR223H	21	44.3086
coatR223H	22	112.857	1.07603	117.147
coatR223H	22	121.437
coatR223H	23	66.7921	1.33124	77.8543
coatR223H	23	88.9164
coatR223H	24	76.1979	1.04939	78.0796
coatR223H	24	79.9614
coatR223H	25	64.6814	2.22732	104.374
coatR223H	25	144.066
coatR223H	26	59.6757	1.09833	62.6096
coatR223H	26	65.5436
coatR223H	27	67.4307	1	67.4307
coatR223H	27	67.4307
coatR223H	28	55.5679	1.49242	69.2493
coatR223H	28	82.9307
coatR223H	29	49.7543	1.0196	50.2418
coatR223H	29	50.7293
coatR223H	30	57.4986	1.10275	60.4525
coatR223H	30	63.4064
coatR223H	31	45.4007	1.05492	46.6475
coatR223H	31	47.8943
coatR223H	32	61.1457	1.17933	66.6282
coatR223H	32	72.1107
coatR223H	33	57.0357	1.12153	60.5014
coatR223H	33	63.9671
coatR223H	34	57.7821	1.06569	59.68
coatR223H	34	61.5779
coatR223H	35	37.3893	1.10274	39.31
coatR223H	35	41.2307
coatR223H	36	51.9421	1.37323	61.6354
coatR223H	36	71.3286
coatR223H	37	66.2707	1.26212	74.9561
coatR223H	37	83.6414
coatR223H	38	51.05	1.16897	55.3629
coatR223H	38	59.6757
coatR223H	39	73.54	1.01182	73.9746
coatR223H	39	74.4093
coatR223H	40	72.9829	1.23192	81.4461
coatR223H	40	89.9093
coatR223H	41	83.8121	1.1583	90.4461
coatR223H	41	97.08
coatR223H	42	72.0686	1.11165	76.0918
coatR223H	42	80.115
coatR223H	43	56.8921	1.10514	59.8829
coatR223H	43	62.8736
coatR223H	44	61.0921	1.45221	74.9055
coatR223H	44	88.7188
coatR223H	45	59	1.01086	59.3203
coatR223H	45	59.6406
coatR223H	46	46.2836	1.8613	66.2158
coatR223H	46	86.1479
coatR223H	47	46.0327	1.37108	54.5736
coatR223H	47	63.1145
coatR223H	48	83.0018	1.14622	89.07
coatR223H	48	95.1382
coatR223H	49	74.5679	1.00089	74.6009
coatR223H	49	74.6339
coatR223H	50	94.9812	1.03812	96.7915
coatR223H	50	98.6018
coat scaffold	1	75.6064	1.01909	76.3282
coat scaffold	1	77.05
coat scaffold	2	74.9693	1.0522	76.9261
coat scaffold	2	78.8829
coat scaffold	3	82.1271	1.01129	82.5907
coat scaffold	3	83.0543
coat scaffold	4	73.3593	1.01338	73.85
coat scaffold	4	74.3407
coat scaffold	5	71.4286	1.00578	71.635
coat scaffold	5	71.8414
coat scaffold	6	70.4793	1.02976	71.5279
coat scaffold	6	72.5764
coat scaffold	7	73.3593	1.09209	76.7371
coat scaffold	7	80.115
coat scaffold	8	65.2936	1.09352	68.3468
coat scaffold	8	71.4
coat scaffold	9	74.3407	1.02733	75.3564
coat scaffold	9	76.3721
coat scaffold	10	69.0457	1.03905	70.3939
coat scaffold	10	71.7421
coat scaffold	11	70.9271	1.01689	71.5261
coat scaffold	11	72.125
coat scaffold	12	71.4429	1.00479	71.6139
coat scaffold	12	71.785
coat scaffold	13	80.3186	1.01523	80.93
coat scaffold	13	81.5414
coat scaffold	14	75.1871	1.07515	78.0121
coat scaffold	14	80.8371
coat scaffold	15	75.39	1.07259	78.1264
coat scaffold	15	80.8629
coat scaffold	16	70.7393	1.01478	71.2621
coat scaffold	16	71.785
coat scaffold	17	70.5664	1.04489	72.1504
coat scaffold	17	73.7343
coat scaffold	18	71.785	1.05079	73.6079
coat scaffold	18	75.4307
coat scaffold	19	76.7979	1.05358	78.8554
coat scaffold	19	80.9129
coat scaffold	20	73.54	1.05634	75.6118
coat scaffold	20	77.6836
coat scaffold	21	71.0993	1.08519	74.1279
coat scaffold	21	77.1564
coat scaffold	22	75.16	1.03287	76.3954
coat scaffold	22	77.6307
coat scaffold	23	68.5864	1.12495	72.8714
coat scaffold	23	77.1564
coat scaffold	24	72.5343	1.0925	75.8889
coat scaffold	24	79.2436
coat scaffold	25	74.1207	1.06022	76.3525
coat scaffold	25	78.5843
coat scaffold	26	72.2807	1.02717	73.2625
coat scaffold	26	74.2443
coat scaffold	27	69.7807	1.08097	72.6057
coat scaffold	27	75.4307
coat scaffold	28	75.9293	1.01981	76.6814
coat scaffold	28	77.4336
coat scaffold	29	66.4557	1.12544	70.6239
coat scaffold	29	74.7921
coat scaffold	30	62.0893	1.21422	68.7396
coat scaffold	30	75.39
coat scaffold	31	72.8429	1.04404	74.4468
coat scaffold	31	76.0507
coat scaffold	32	73.7479	1.06822	76.2636
coat scaffold	32	78.7793
coat scaffold	33	69.7079	1.19709	76.5771
coat scaffold	33	83.4464
coat scaffold	34	72.1107	1.04848	73.8586
coat scaffold	34	75.6064
coat scaffold	35	66.4867	1.12026	70.4846
coat scaffold	35	74.4824
coat scaffold	36	60.8347	1.27505	69.201
coat scaffold	36	77.5672
coat scaffold	37	70.52	1.01419	71.0203
coat scaffold	37	71.5206
coat scaffold	38	85.0048	1.07874	88.3517
coat scaffold	38	91.6985
coat scaffold	39	71.4697	1.0427	72.9958
coat scaffold	39	74.5218
coat scaffold	40	76.0309	1.01958	76.7751
coat scaffold	40	77.5194
coat scaffold	41	73.641	1.03519	74.9367
coat scaffold	41	76.2324
coat scaffold	42	70.2179	1.03692	71.5142
coat scaffold	42	72.8105
coat scaffold	43	71.5006	1.12277	75.8895
coat scaffold	43	80.2785
coat scaffold	44	71.8686	1.02812	72.8792
coat scaffold	44	73.8898
coat scaffold	45	71.6743	1.17268	77.8626
coat scaffold	45	84.0508
coat scaffold	46	70.7173	1.0538	72.6196
coat scaffold	46	74.5218
coat scaffold	47	74.9528	1.03197	76.151
coat scaffold	47	77.3493
coat scaffold	48	73.641	1.05881	75.8066
coat scaffold	48	77.9722
coat scaffold	49	71.0581	1.04874	72.79
coat scaffold	49	74.5218
coat scaffold	50	65.655	1.1876	71.8136
coat scaffold	50	77.9722
coat scaffold (and decoration)	1	71.785	1.07114	74.3382
coat scaffold (and decoration)	1	76.8914
coat scaffold (and decoration)	2	70.7393	1.1153	74.8175
coat scaffold (and decoration)	2	78.8957
coat scaffold (and decoration)	3	68.0486	1.1594	73.4721
coat scaffold (and decoration)	3	78.8957
coat scaffold (and decoration)	4	69.7664	1.0868	72.7943
coat scaffold (and decoration)	4	75.8221
coat scaffold (and decoration)	5	77.2621	1.01358	77.7868
coat scaffold (and decoration)	5	78.3114
coat scaffold (and decoration)	6	77.4336	1.01754	78.1129
coat scaffold (and decoration)	6	78.7921
coat scaffold (and decoration)	7	82.8329	1.00474	83.0293
coat scaffold (and decoration)	7	83.2257
coat scaffold (and decoration)	8	72.7307	1.08902	75.9679
coat scaffold (and decoration)	8	79.205
coat scaffold (and decoration)	9	77.4336	1.00863	77.7679
coat scaffold (and decoration)	9	78.1021
coat scaffold (and decoration)	10	73.4571	1.03731	74.8275
coat scaffold (and decoration)	10	76.1979
coat scaffold (and decoration)	11	74.9557	1.07341	77.7068
coat scaffold (and decoration)	11	80.4579
coat scaffold (and decoration)	12	61.0786	1.20402	67.3093
coat scaffold (and decoration)	12	73.54
coat scaffold (and decoration)	13	69.105	1.01716	69.6979
coat scaffold (and decoration)	13	70.2907
coat scaffold (and decoration)	14	70.5664	1.00856	70.8686
coat scaffold (and decoration)	14	71.1707
coat scaffold (and decoration)	15	75.8221	1.02956	76.9429
coat scaffold (and decoration)	15	78.0636
coat scaffold (and decoration)	16	75.8221	1.00989	76.1971
coat scaffold (and decoration)	16	76.5721
coat scaffold (and decoration)	17	71.72	1.059	73.8358
coat scaffold (and decoration)	17	75.9515
coat scaffold (and decoration)	18	69.9467	1.12467	74.3067
coat scaffold (and decoration)	18	78.6667
coat scaffold (and decoration)	19	70.7455	1.0928	74.0279
coat scaffold (and decoration)	19	77.3103
coat scaffold (and decoration)	20	76.4503	1.0118	76.9015
coat scaffold (and decoration)	20	77.3527
coat scaffold (and decoration)	21	78.4352	1.00643	78.6873
coat scaffold (and decoration)	21	78.9394
coat scaffold (and decoration)	22	84.2273	1.04176	85.9861
coat scaffold (and decoration)	22	87.7448
coat scaffold (and decoration)	23	79.2436	1.02646	80.2921
coat scaffold (and decoration)	23	81.3407
coat scaffold (and decoration)	24	76.0507	1.02492	76.9982
coat scaffold (and decoration)	24	77.9457
coat scaffold (and decoration)	25	71.3286	1.02633	72.2675
coat scaffold (and decoration)	25	73.2064
coat scaffold (and decoration)	26	69.105	1.03816	70.4236
coat scaffold (and decoration)	26	71.7421
coat scaffold (and decoration)	27	72.1957	1.05766	74.2771
coat scaffold (and decoration)	27	76.3586
coat scaffold (and decoration)	28	72.5764	1.06528	74.9454
coat scaffold (and decoration)	28	77.3143
coat scaffold (and decoration)	29	77.4729	1.01082	77.8921
coat scaffold (and decoration)	29	78.3114
coat scaffold (and decoration)	30	68.8093	1.08992	71.9029
coat scaffold (and decoration)	30	74.9964
coat scaffold (and decoration)	31	64.2064	1.08842	67.045
coat scaffold (and decoration)	31	69.8836
coat scaffold (and decoration)	32	67.8686	1.04507	69.3979
coat scaffold (and decoration)	32	70.9271
coat scaffold (and decoration)	33	71.8414	1.05391	73.7779
coat scaffold (and decoration)	33	75.7143
coat scaffold (and decoration)	34	81.4414	1.0324	82.7607
coat scaffold (and decoration)	34	84.08
coat scaffold (and decoration)	35	70.5664	1.07142	73.0864
coat scaffold (and decoration)	35	75.6064
coat scaffold (and decoration)	36	75.4307	1.04765	77.2279
coat scaffold (and decoration)	36	79.025
coat scaffold (and decoration)	37	75.7143	1.11385	80.0243
coat scaffold (and decoration)	37	84.3343
coat scaffold (and decoration)	38	75.7679	1.05653	77.9093
coat scaffold (and decoration)	38	80.0507
coat scaffold (and decoration)	39	67.3857	1.08098	70.1143
coat scaffold (and decoration)	39	72.8429
coat scaffold (and decoration)	40	63.0029	1.08862	65.7946
coat scaffold (and decoration)	40	68.5864
coat scaffold (and decoration)	41	67.2793	1.18926	73.6461
coat scaffold (and decoration)	41	80.0129
coat scaffold (and decoration)	42	72.8714	1.2156	80.7271
coat scaffold (and decoration)	42	88.5829
coat scaffold (and decoration)	43	66.9143	1.12078	70.9554
coat scaffold (and decoration)	43	74.9964
coat scaffold (and decoration)	44	83.2993	1.02927	84.5186
coat scaffold (and decoration)	44	85.7379
coat scaffold (and decoration)	45	76.3586	1.01666	76.9946
coat scaffold (and decoration)	45	77.6307
coat scaffold (and decoration)	46	71.0421	1.04874	72.7736
coat scaffold (and decoration)	46	74.505
coat scaffold (and decoration)	47	73.89	1.14727	79.3307
coat scaffold (and decoration)	47	84.7714
coat scaffold (and decoration)	48	70.7464	1.06401	73.0107
coat scaffold (and decoration)	48	75.275
coat scaffold (and decoration)	49	77.6471	1.00456	77.8243
coat scaffold (and decoration)	49	78.0014
coat scaffold (and decoration)	50	66.0129	1.14768	70.8871
coat scaffold (and decoration)	50	75.7614
coatR223H scaffold (and decoration)	1	81.4286	1.05296	83.5846
coatR223H scaffold (and decoration)	1	85.7407
coatR223H scaffold (and decoration)	2	68.605	1.03121	69.6757
coatR223H scaffold (and decoration)	2	70.7464
coatR223H scaffold (and decoration)	3	75.0307	1.0571	77.1729
coatR223H scaffold (and decoration)	3	79.315
coatR223H scaffold (and decoration)	4	75	1.08609	78.2282
coatR223H scaffold (and decoration)	4	81.4564
coatR223H scaffold (and decoration)	5	72.8571	1.08824	76.0714
coatR223H scaffold (and decoration)	5	79.2857
coatR223H scaffold (and decoration)	6	79.2857	1.02738	80.3711
coatR223H scaffold (and decoration)	6	81.4564
coatR223H scaffold (and decoration)	7	75.0307	1.02855	76.1018
coatR223H scaffold (and decoration)	7	77.1729
coatR223H scaffold (and decoration)	8	75.0307	1.11383	79.3011
coatR223H scaffold (and decoration)	8	83.5714
coatR223H scaffold (and decoration)	9	77.1729	1.11102	81.4568
coatR223H scaffold (and decoration)	9	85.7407
coatR223H scaffold (and decoration)	10	69.105	1.21569	76.5575
coatR223H scaffold (and decoration)	10	84.01
coatR223H scaffold (and decoration)	11	68.605	1.12619	72.9336
coatR223H scaffold (and decoration)	11	77.2621
coatR223H scaffold (and decoration)	12	72.9829	1.02806	74.0068
coatR223H scaffold (and decoration)	12	75.0307
coatR223H scaffold (and decoration)	13	75	1.02857	76.0714
coatR223H scaffold (and decoration)	13	77.1429
coatR223H scaffold (and decoration)	14	77.1729	1.05661	79.3571
coatR223H scaffold (and decoration)	14	81.5414
coatR223H scaffold (and decoration)	15	72.8571	1.05924	75.015
coatR223H scaffold (and decoration)	15	77.1729
coatR223H scaffold (and decoration)	16	73.9903	1.13506	78.9869
coatR223H scaffold (and decoration)	16	83.9836
coatR223H scaffold (and decoration)	17	76.9846	1.00239	77.0767
coatR223H scaffold (and decoration)	17	77.1687
coatR223H scaffold (and decoration)	18	70.8359	1.04272	72.349
coatR223H scaffold (and decoration)	18	73.8621
coatR223H scaffold (and decoration)	19	66.0821	1.16615	71.5718
coatR223H scaffold (and decoration)	19	77.0615
coatR223H scaffold (and decoration)	20	77.7949	1.01802	78.4959
coatR223H scaffold (and decoration)	20	79.1969
coatR223H scaffold (and decoration)	21	74.2615	1.13035	79.1015
coatR223H scaffold (and decoration)	21	83.9415
coatR223H scaffold (and decoration)	22	76.4292	1.05078	78.3697
coatR223H scaffold (and decoration)	22	80.3103
coatR223H scaffold (and decoration)	23	77.3067	1.05549	79.4515
coatR223H scaffold (and decoration)	23	81.5964
coatR223H scaffold (and decoration)	24	81.5964	1.02874	82.769
coatR223H scaffold (and decoration)	24	83.9415
coatR223H scaffold (and decoration)	25	69.2477	1.07217	71.7467
coatR223H scaffold (and decoration)	25	74.2456
coatR223H scaffold (and decoration)	26	73.9103	1.04097	75.4244
coatR223H scaffold (and decoration)	26	76.9385
coatR223H scaffold (and decoration)	27	75.7314	1.00359	75.8675
coatR223H scaffold (and decoration)	27	76.0036
coatR223H scaffold (and decoration)	28	73.6407	1.0798	76.5789
coatR223H scaffold (and decoration)	28	79.5171
coatR223H scaffold (and decoration)	29	71.0057	1.02784	71.9943
coatR223H scaffold (and decoration)	29	72.9829
coatR223H scaffold (and decoration)	30	70.7143	1.06104	72.8725
coatR223H scaffold (and decoration)	30	75.0307
coatR223H scaffold (and decoration)	31	70.7464	1.09041	73.9446
coatR223H scaffold (and decoration)	31	77.1429
coatR223H scaffold (and decoration)	32	77.2621	1.05721	79.4721
coatR223H scaffold (and decoration)	32	81.6821
coatR223H scaffold (and decoration)	33	72.9829	1.18758	79.8279
coatR223H scaffold (and decoration)	33	86.6729
coatR223H scaffold (and decoration)	34	68.5714	1.12544	72.8721
coatR223H scaffold (and decoration)	34	77.1729
coatR223H scaffold (and decoration)	35	68.5714	1.03172	69.6589
coatR223H scaffold (and decoration)	35	70.7464
coatR223H scaffold (and decoration)	36	75.1221	1.0269	76.1325
coatR223H scaffold (and decoration)	36	77.1429
coatR223H scaffold (and decoration)	37	72.8886	1.02939	73.9596
coatR223H scaffold (and decoration)	37	75.0307
coatR223H scaffold (and decoration)	38	77.2621	1.02619	78.2739
coatR223H scaffold (and decoration)	38	79.2857
coatR223H scaffold (and decoration)	39	71.2321	1.02458	72.1075
coatR223H scaffold (and decoration)	39	72.9829
coatR223H scaffold (and decoration)	40	72.8571	1.17647	79.2857
coatR223H scaffold (and decoration)	40	85.7143
coatR223H scaffold (and decoration)	41	66.4286	1.065	68.5875
coatR223H scaffold (and decoration)	41	70.7464
coatR223H scaffold (and decoration)	42	75	1.05869	77.2007
coatR223H scaffold (and decoration)	42	79.4014
coatR223H scaffold (and decoration)	43	75.1221	1.06158	77.435
coatR223H scaffold (and decoration)	43	79.7479
coatR223H scaffold (and decoration)	44	79.7479	1.21393	88.2782
coatR223H scaffold (and decoration)	44	96.8086
coatR223H scaffold (and decoration)	45	70.7464	1.00367	70.8761
coatR223H scaffold (and decoration)	45	71.0057
coatR223H scaffold (and decoration)	46	66.9793	1.09198	70.0596
coatR223H scaffold (and decoration)	46	73.14
coatR223H scaffold (and decoration)	47	68.705	1.06043	70.7811
coatR223H scaffold (and decoration)	47	72.8571
coatR223H scaffold (and decoration)	48	73.3593	1.02278	74.195
coatR223H scaffold (and decoration)	48	75.0307
coatR223H scaffold (and decoration)	49	75.7614	1.01863	76.4671
coatR223H scaffold (and decoration)	49	77.1729
coatR223H scaffold (and decoration)	50	65.5586	1.02167	66.2689
coatR223H scaffold (and decoration)	50	66.9793
coat TcaP	1	42.3904	1.08676	44.2294
coat TcaP	1	46.0684
coat TcaP	2	50.862	1.0188	51.3402
coat TcaP	2	51.8184
coat TcaP	3	40.2439	1.07712	41.7957
coat TcaP	3	43.3475
coat TcaP	4	37.7058	1.04831	38.6165
coat TcaP	4	39.5272
coat TcaP	5	39.3789	1.0403	40.1725
coat TcaP	5	40.9661
coat TcaP	6	40.3166	1.10495	42.4322
coat TcaP	6	44.5478
coat TcaP	7	40.2439	1.09503	42.1562
coat TcaP	7	44.0684
coat TcaP	8	43.7349	1.07994	45.4831
coat TcaP	8	47.2312
coat TcaP	9	43.7349	1.00649	43.8768
coat TcaP	9	44.0188
coat TcaP	10	41.2337	1.12188	43.7464
coat TcaP	10	46.2591
coat TcaP	11	42.2863	1.0263	42.8423
coat TcaP	11	43.3983
coat TcaP	12	42.3553	1.03058	43.003
coat TcaP	12	43.6507
coat TcaP	13	41.1265	1.14314	44.0699
coat TcaP	13	47.0133
coat TcaP	14	41.109	1.09283	43.0169
coat TcaP	14	44.9249
coat TcaP	15	39.9334	1.10355	42.0009
coat TcaP	15	44.0684
coat TcaP	16	42.3553	1.08842	44.2279
coat TcaP	16	46.1005
coat TcaP	17	41.1622	1.02097	41.5938
coat TcaP	17	42.0254
coat TcaP	18	41.7458	1.02861	42.3429
coat TcaP	18	42.9401
coat TcaP	19	46.1005	1.04551	47.1495
coat TcaP	19	48.1985
coat TcaP	20	40.2439	1.00856	40.4162
coat TcaP	20	40.5884
coat TcaP	21	40.6065	1.05367	41.6961
coat TcaP	21	42.7857
coat TcaP	22	42.6489	1.08465	44.454
coat TcaP	22	46.2591
coat TcaP	23	44.8105	1.07153	46.4131
coat TcaP	23	48.0157
coat TcaP	24	33.5726	1.09675	35.1967
coat TcaP	24	36.8208
coat TcaP	25	46.3384	1.00815	46.5272
coat TcaP	25	46.7161
coat TcaP	26	44.4354	1.02525	44.9964
coat TcaP	26	45.5574
coat TcaP	27	44.9882	1.01265	45.2728
coat TcaP	27	45.5574
coat TcaP	28	45.9251	1.01264	46.2154
coat TcaP	28	46.5056
coat TcaP	29	42.1636	1.01877	42.5592
coat TcaP	29	42.9549
coat TcaP	30	43.2841	1.0081	43.4595
coat TcaP	30	43.6349
coat TcaP	31	44.4944	1.12407	47.2546
coat TcaP	31	50.0149
coat TcaP	32	44.7185	1.08259	46.5651
coat TcaP	32	48.4118
coat TcaP	33	42.8441	1.03381	43.5685
coat TcaP	33	44.2928
coat TcaP	34	43.2841	1.0581	44.5415
coat TcaP	34	45.799
coat TcaP	35	45.4185	1.06591	46.9151
coat TcaP	35	48.4118
coat TcaP	36	39.0554	1.08564	40.7277
coat TcaP	36	42.4
coat TcaP	37	46.4379	1.035	47.2505
coat TcaP	37	48.0631
coat TcaP	38	42.8318	1.07222	44.3785
coat TcaP	38	45.9251
coat TcaP	39	36.6944	1.01743	37.0141
coat TcaP	39	37.3338
coat TcaP	40	42.8441	1.07299	44.4077
coat TcaP	40	45.9713
coat TcaP	41	45.0349	1.13461	48.0659
coat TcaP	41	51.0969
coat TcaP	42	43.8995	1.01355	44.1969
coat TcaP	42	44.4944
coat TcaP	43	39.2569	1.14509	42.1049
coat TcaP	43	44.9528
coat TcaP	44	44.2928	1.04202	45.2233
coat TcaP	44	46.1538
coat TcaP	45	44.2456	1.00321	44.3167
coat TcaP	45	44.3877
coat TcaP	46	48.5964	1.03071	49.3426
coat TcaP	46	50.0887
coat TcaP	47	43.5144	1.08653	45.3969
coat TcaP	47	47.2795
coat TcaP	48	44.2928	1.00214	44.3403
coat TcaP	48	44.3877
coat TcaP	49	45.5456	1.06698	47.071
coat TcaP	49	48.5964
coat TcaP	50	43.8995	1.04406	44.8667
coat TcaP	50	45.8338
coat scaffold (and decoration) TcaP	1	41.8182	1.00094	41.8379
coat scaffold (and decoration) TcaP	1	41.8576
coat scaffold (and decoration) TcaP	2	43.6364	1.00086	43.6552
coat scaffold (and decoration) TcaP	2	43.6739
coat scaffold (and decoration) TcaP	3	43.6364	1	43.6364
coat scaffold (and decoration) TcaP	3	43.6364
coat scaffold (and decoration) TcaP	4	43.6364	1	43.6364
coat scaffold (and decoration) TcaP	4	43.6364
coat scaffold (and decoration) TcaP	5	41.8182	1.17391	45.4545
coat scaffold (and decoration) TcaP	5	49.0909
coat scaffold (and decoration) TcaP	6	43.6739	1.12403	46.3824
coat scaffold (and decoration) TcaP	6	49.0909
coat scaffold (and decoration) TcaP	7	43.6364	1.04167	44.5455
coat scaffold (and decoration) TcaP	7	45.4545
coat scaffold (and decoration) TcaP	8	40	1.09091	41.8182
coat scaffold (and decoration) TcaP	8	43.6364
coat scaffold (and decoration) TcaP	9	45.4545	1	45.4545
coat scaffold (and decoration) TcaP	9	45.4545
coat scaffold (and decoration) TcaP	10	41.8576	1.00282	41.9167
coat scaffold (and decoration) TcaP	10	41.9758
coat scaffold (and decoration) TcaP	11	41.8576	1	41.8576
coat scaffold (and decoration) TcaP	11	41.8576
coat scaffold (and decoration) TcaP	12	43.9758	1.07814	45.6939
coat scaffold (and decoration) TcaP	12	47.4121
coat scaffold (and decoration) TcaP	13	45.6	1.00396	45.6903
coat scaffold (and decoration) TcaP	13	45.7806
coat scaffold (and decoration) TcaP	14	45.4545	1.04	46.3636
coat scaffold (and decoration) TcaP	14	47.2727
coat scaffold (and decoration) TcaP	15	41.8576	1.0425	42.747
coat scaffold (and decoration) TcaP	15	43.6364
coat scaffold (and decoration) TcaP	16	41.8182	1.00846	41.9952
coat scaffold (and decoration) TcaP	16	42.1721
coat scaffold (and decoration) TcaP	17	45.4545	1.08075	47.2897
coat scaffold (and decoration) TcaP	17	49.1248
coat scaffold (and decoration) TcaP	18	40.3703	1.12954	42.9852
coat scaffold (and decoration) TcaP	18	45.6
coat scaffold (and decoration) TcaP	19	43.7879	1.13334	46.7073
coat scaffold (and decoration) TcaP	19	49.6267
coat scaffold (and decoration) TcaP	20	47.4121	1.00368	47.4994
coat scaffold (and decoration) TcaP	20	47.5867
coat scaffold (and decoration) TcaP	21	42.1721	1.04277	43.0739
coat scaffold (and decoration) TcaP	21	43.9758
coat scaffold (and decoration) TcaP	22	43.103	1.02721	43.6894
coat scaffold (and decoration) TcaP	22	44.2758
coat scaffold (and decoration) TcaP	23	38.5846	1.23668	43.1508
coat scaffold (and decoration) TcaP	23	47.7169
coat scaffold (and decoration) TcaP	24	44.7215	1.01876	45.141
coat scaffold (and decoration) TcaP	24	45.5605
coat scaffold (and decoration) TcaP	25	38.4615	1.14403	41.2313
coat scaffold (and decoration) TcaP	25	44.001
coat scaffold (and decoration) TcaP	26	44.001	1.0979	46.1549
coat scaffold (and decoration) TcaP	26	48.3087
coat scaffold (and decoration) TcaP	27	41.3959	1.14489	44.3949
coat scaffold (and decoration) TcaP	27	47.3938
coat scaffold (and decoration) TcaP	28	43.7313	1.06995	45.2608
coat scaffold (and decoration) TcaP	28	46.7903
coat scaffold (and decoration) TcaP	29	40.2656	1.19426	44.1767
coat scaffold (and decoration) TcaP	29	48.0877
coat scaffold (and decoration) TcaP	30	41.7938	1.09817	43.8454
coat scaffold (and decoration) TcaP	30	45.8969
coat scaffold (and decoration) TcaP	31	41.5672	1.04225	42.4454
coat scaffold (and decoration) TcaP	31	43.3236
coat scaffold (and decoration) TcaP	32	40.2656	1.03795	41.0297
coat scaffold (and decoration) TcaP	32	41.7938
coat scaffold (and decoration) TcaP	33	40	1.04131	40.8262
coat scaffold (and decoration) TcaP	33	41.6523
coat scaffold (and decoration) TcaP	34	41.5385	1.11173	43.859
coat scaffold (and decoration) TcaP	34	46.1795
coat scaffold (and decoration) TcaP	35	40.0297	1.03841	40.7985
coat scaffold (and decoration) TcaP	35	41.5672
coat scaffold (and decoration) TcaP	36	36.9549	1.20729	40.7851
coat scaffold (and decoration) TcaP	36	44.6154
coat scaffold (and decoration) TcaP	37	38.2144	1.1135	40.3831
coat scaffold (and decoration) TcaP	37	42.5518
coat scaffold (and decoration) TcaP	38	45.6897	1.03071	46.3913
coat scaffold (and decoration) TcaP	38	47.0928
coat scaffold (and decoration) TcaP	39	46.1795	1.08107	48.0513
coat scaffold (and decoration) TcaP	39	49.9231
coat scaffold (and decoration) TcaP	40	42.4	1.05023	43.4649
coat scaffold (and decoration) TcaP	40	44.5297
coat scaffold (and decoration) TcaP	41	41.8631	1.05463	43.0067
coat scaffold (and decoration) TcaP	41	44.1503
coat scaffold (and decoration) TcaP	42	41.0256	1.1718	44.5497
coat scaffold (and decoration) TcaP	42	48.0738
coat scaffold (and decoration) TcaP	43	42.9426	1.04709	43.9536
coat scaffold (and decoration) TcaP	43	44.9646
coat scaffold (and decoration) TcaP	44	43.7313	1.00385	43.8154
coat scaffold (and decoration) TcaP	44	43.8995
coat scaffold (and decoration) TcaP	45	43.1256	1.04644	44.1269
coat scaffold (and decoration) TcaP	45	45.1282
coat scaffold (and decoration) TcaP	46	44.1144	1.09298	46.1651
coat scaffold (and decoration) TcaP	46	48.2159
coat scaffold (and decoration) TcaP	47	43.1256	1.02514	43.6677
coat scaffold (and decoration) TcaP	47	44.2097
coat scaffold (and decoration) TcaP	48	41.3451	1.09179	43.2426
coat scaffold (and decoration) TcaP	48	45.14
coat scaffold (and decoration) TcaP	49	44.5297	1.01187	44.7941
coat scaffold (and decoration) TcaP	49	45.0585
coat scaffold (and decoration) TcaP	50	46.9672	1.13491	50.1354
coat scaffold (and decoration) TcaP	50	53.3036
coatR223H TcaP	1	44.8579	1.06817	46.3868
coatR223H TcaP	1	47.9157
coatR223H TcaP	2	41.5271	1.13575	44.3457
coatR223H TcaP	2	47.1643
coatR223H TcaP	3	47.1429	1.00412	47.24
coatR223H TcaP	3	47.3371
coatR223H TcaP	4	40.6329	1.05474	41.745
coatR223H TcaP	4	42.8571
coatR223H TcaP	5	40.6079	1.01291	40.87
coatR223H TcaP	5	41.1321
coatR223H TcaP	6	45.7143	1.00778	45.8921
coatR223H TcaP	6	46.07
coatR223H TcaP	7	42.185	1.08048	43.8825
coatR223H TcaP	7	45.58
coatR223H TcaP	8	41.1321	1.05632	42.2904
coatR223H TcaP	8	43.4486
coatR223H TcaP	9	47.1643	1.03162	47.91
coatR223H TcaP	9	48.6557
coatR223H TcaP	10	40.0257	1.10873	42.2018
coatR223H TcaP	10	44.3779
coatR223H TcaP	11	44.835	1.10606	47.2125
coatR223H TcaP	11	49.59
coatR223H TcaP	12	42.8807	1.07902	44.575
coatR223H TcaP	12	46.2693
coatR223H TcaP	13	40.9329	1.00668	41.0696
coatR223H TcaP	13	41.2064
coatR223H TcaP	14	42.6186	1.04934	43.67
coatR223H TcaP	14	44.7214
coatR223H TcaP	15	46.3571	1.14396	49.6939
coatR223H TcaP	15	53.0307
coatR223H TcaP	16	40.6579	1.05935	41.8643
coatR223H TcaP	16	43.0707
coatR223H TcaP	17	43.4486	1.00161	43.4836
coatR223H TcaP	17	43.5186
coatR223H TcaP	18	36.5057	1.20805	40.3032
coatR223H TcaP	18	44.1007
coatR223H TcaP	19	40.2543	1.1323	42.9171
coatR223H TcaP	19	45.58
coatR223H TcaP	20	47.1643	1.03606	48.0146
coatR223H TcaP	20	48.865
coatR223H TcaP	21	48.76	1.03211	49.5429
coatR223H TcaP	21	50.3257
coatR223H TcaP	22	41.2307	1.15176	44.3593
coatR223H TcaP	22	47.4879
coatR223H TcaP	23	36.8671	1.08567	38.4464
coatR223H TcaP	23	40.0257
coatR223H TcaP	24	42.8807	1.03277	43.5832
coatR223H TcaP	24	44.2857
coatR223H TcaP	25	37.0879	1.12301	39.3689
coatR223H TcaP	25	41.65
coatR223H TcaP	26	45.4007	1.00739	45.5686
coatR223H TcaP	26	45.7364
coatR223H TcaP	27	47.1429	1.06233	48.6121
coatR223H TcaP	27	50.0814
coatR223H TcaP	28	47.6807	1.74007	65.3243
coatR223H TcaP	28	82.9679
coatR223H TcaP	29	40.2293	1.12855	42.815
coatR223H TcaP	29	45.4007
coatR223H TcaP	30	44.7214	1.133	47.6954
coatR223H TcaP	30	50.6693
coatR223H TcaP	31	42.4743	1.09142	44.4157
coatR223H TcaP	31	46.3571
coatR223H TcaP	32	36.4214	1.05393	37.4036
coatR223H TcaP	32	38.3857
coatR223H TcaP	33	43.7293	1	43.7293
coatR223H TcaP	33	43.7293
coatR223H TcaP	34	40.8579	1.15435	44.0111
coatR223H TcaP	34	47.1643
coatR223H TcaP	35	42.8807	1.0999	45.0225
coatR223H TcaP	35	47.1643
coatR223H TcaP	36	41.65	1.14016	44.5689
coatR223H TcaP	36	47.4879
coatR223H TcaP	37	31.4607	1.29075	36.0343
coatR223H TcaP	37	40.6079
coatR223H TcaP	38	40.4564	1.10316	42.5432
coatR223H TcaP	38	44.63
coatR223H TcaP	39	41.4286	1.04876	42.4386
coatR223H TcaP	39	43.4486
coatR223H TcaP	40	44.3086	1.07611	45.9946
coatR223H TcaP	40	47.6807
coatR223H TcaP	41	40.8579	1.17274	44.3868
coatR223H TcaP	41	47.9157
coatR223H TcaP	42	40.9329	1.07059	42.3775
coatR223H TcaP	42	43.8221
coatR223H TcaP	43	42.8571	1.00055	42.8689
coatR223H TcaP	43	42.8807
coatR223H TcaP	44	42.8807	1.00443	42.9757
coatR223H TcaP	44	43.0707
coatR223H TcaP	45	42.8807	1.0994	45.0118
coatR223H TcaP	45	47.1429
coatR223H TcaP	46	41.4286	1.13793	44.2857
coatR223H TcaP	46	47.1429
coatR223H TcaP	47	42.8571	1.00055	42.8689
coatR223H TcaP	47	42.8807
coatR223H TcaP	48	40	1.10771	42.1543
coatR223H TcaP	48	44.3086
coatR223H TcaP	49	42.8571	1.03333	43.5714
coatR223H TcaP	49	44.2857
coatR223H TcaP	50	45.7364	1.03122	46.4504
coatR223H TcaP	50	47.1643
coatR223H scaffold (and decoration) TcaP	1	72.0067	1.10654	75.8424
coatR223H scaffold (and decoration) TcaP	1	79.6782
coatR223H scaffold (and decoration) TcaP	2	41.7964	1.03756	42.5812
coatR223H scaffold (and decoration) TcaP	2	43.3661
coatR223H scaffold (and decoration) TcaP	3	67.8139	1.06363	69.9715
coatR223H scaffold (and decoration) TcaP	3	72.1291
coatR223H scaffold (and decoration) TcaP	4	59.5915	1.01784	60.123
coatR223H scaffold (and decoration) TcaP	4	60.6545
coatR223H scaffold (and decoration) TcaP	5	60.6061	1.06471	62.567
coatR223H scaffold (and decoration) TcaP	5	64.5279
coatR223H scaffold (and decoration) TcaP	6	50.9812	1.23565	56.9882
coatR223H scaffold (and decoration) TcaP	6	62.9952
coatR223H scaffold (and decoration) TcaP	7	49.697	1.15899	53.6476
coatR223H scaffold (and decoration) TcaP	7	57.5982
coatR223H scaffold (and decoration) TcaP	8	42.4242	1.08571	44.2424
coatR223H scaffold (and decoration) TcaP	8	46.0606
coatR223H scaffold (and decoration) TcaP	9	46.0764	1.0526	47.2882
coatR223H scaffold (and decoration) TcaP	9	48.5
coatR223H scaffold (and decoration) TcaP	10	43.6364	1.02815	44.2506
coatR223H scaffold (and decoration) TcaP	10	44.8648
coatR223H scaffold (and decoration) TcaP	11	43.6533	1.02738	44.2509
coatR223H scaffold (and decoration) TcaP	11	44.8485
coatR223H scaffold (and decoration) TcaP	12	42.4933	1.05581	43.6791
coatR223H scaffold (and decoration) TcaP	12	44.8648
coatR223H scaffold (and decoration) TcaP	13	44.8485	1.05441	46.0685
coatR223H scaffold (and decoration) TcaP	13	47.2885
coatR223H scaffold (and decoration) TcaP	14	41.2121	1.08863	43.0385
coatR223H scaffold (and decoration) TcaP	14	44.8648
coatR223H scaffold (and decoration) TcaP	15	41.2297	1.02897	41.827
coatR223H scaffold (and decoration) TcaP	15	42.4242
coatR223H scaffold (and decoration) TcaP	16	46.0606	1.05263	47.2727
coatR223H scaffold (and decoration) TcaP	16	48.4848
coatR223H scaffold (and decoration) TcaP	17	46.0764	1.02596	46.6745
coatR223H scaffold (and decoration) TcaP	17	47.2727
coatR223H scaffold (and decoration) TcaP	18	43.7036	1.0572	44.9536
coatR223H scaffold (and decoration) TcaP	18	46.2036
coatR223H scaffold (and decoration) TcaP	19	44.9958	1.05095	46.1421
coatR223H scaffold (and decoration) TcaP	19	47.2885
coatR223H scaffold (and decoration) TcaP	20	48.4848	1.0503	49.7042
coatR223H scaffold (and decoration) TcaP	20	50.9236
coatR223H scaffold (and decoration) TcaP	21	57.0855	1.04131	58.2645
coatR223H scaffold (and decoration) TcaP	21	59.4436
coatR223H scaffold (and decoration) TcaP	22	49.697	1.02468	50.3103
coatR223H scaffold (and decoration) TcaP	22	50.9236
coatR223H scaffold (and decoration) TcaP	23	42.4418	1.03172	43.1148
coatR223H scaffold (and decoration) TcaP	23	43.7879
coatR223H scaffold (and decoration) TcaP	24	47.3345	1.07552	49.1218
coatR223H scaffold (and decoration) TcaP	24	50.9091
coatR223H scaffold (and decoration) TcaP	25	48.5	1.02468	49.0985
coatR223H scaffold (and decoration) TcaP	25	49.697
coatR223H scaffold (and decoration) TcaP	26	48.5	1.02498	49.1058
coatR223H scaffold (and decoration) TcaP	26	49.7115
coatR223H scaffold (and decoration) TcaP	27	46.0606	1.02766	46.6976
coatR223H scaffold (and decoration) TcaP	27	47.3345
coatR223H scaffold (and decoration) TcaP	28	52.2479	1.27787	59.507
coatR223H scaffold (and decoration) TcaP	28	66.7661
coatR223H scaffold (and decoration) TcaP	29	46.0606	1.10526	48.4848
coatR223H scaffold (and decoration) TcaP	29	50.9091
coatR223H scaffold (and decoration) TcaP	30	49.697	1.02555	50.3318
coatR223H scaffold (and decoration) TcaP	30	50.9667
coatR223H scaffold (and decoration) TcaP	31	71.5571	1.03832	72.9282
coatR223H scaffold (and decoration) TcaP	31	74.2993
coatR223H scaffold (and decoration) TcaP	32	40.4564	1.0313	41.0896
coatR223H scaffold (and decoration) TcaP	32	41.7229
coatR223H scaffold (and decoration) TcaP	33	44.6529	1.08964	46.6543
coatR223H scaffold (and decoration) TcaP	33	48.6557
coatR223H scaffold (and decoration) TcaP	34	44.3086	1.06592	45.7689
coatR223H scaffold (and decoration) TcaP	34	47.2293
coatR223H scaffold (and decoration) TcaP	35	44.8579	1.00557	44.9829
coatR223H scaffold (and decoration) TcaP	35	45.1079
coatR223H scaffold (and decoration) TcaP	36	42.8807	1.3409	50.1896
coatR223H scaffold (and decoration) TcaP	36	57.4986
coatR223H scaffold (and decoration) TcaP	37	38.3329	1.03347	38.9743
coatR223H scaffold (and decoration) TcaP	37	39.6157
coatR223H scaffold (and decoration) TcaP	38	40	1.07143	41.4286
coatR223H scaffold (and decoration) TcaP	38	42.8571
coatR223H scaffold (and decoration) TcaP	39	68.0486	1.08882	71.0707
coatR223H scaffold (and decoration) TcaP	39	74.0929
coatR223H scaffold (and decoration) TcaP	40	37.8236	1.26061	42.7521
coatR223H scaffold (and decoration) TcaP	40	47.6807
coatR223H scaffold (and decoration) TcaP	41	40	1.03818	40.7636
coatR223H scaffold (and decoration) TcaP	41	41.5271
coatR223H scaffold (and decoration) TcaP	42	92.6371	1.41076	111.663
coatR223H scaffold (and decoration) TcaP	42	130.689
coatR223H scaffold (and decoration) TcaP	43	44.1243	1.00418	44.2164
coatR223H scaffold (and decoration) TcaP	43	44.3086
coatR223H scaffold (and decoration) TcaP	44	58.6414	1.20335	64.6039
coatR223H scaffold (and decoration) TcaP	44	70.5664
coatR223H scaffold (and decoration) TcaP	45	40.9079	1.01814	41.2789
coatR223H scaffold (and decoration) TcaP	45	41.65
coatR223H scaffold (and decoration) TcaP	46	60.0679	1.40539	72.2432
coatR223H scaffold (and decoration) TcaP	46	84.4186
coatR223H scaffold (and decoration) TcaP	47	38.5979	1.08855	40.3068
coatR223H scaffold (and decoration) TcaP	47	42.0157
coatR223H scaffold (and decoration) TcaP	48	44.355	1.11803	46.9725
coatR223H scaffold (and decoration) TcaP	48	49.59
coatR223H scaffold (and decoration) TcaP	49	67.1579	1.08902	70.1471
coatR223H scaffold (and decoration) TcaP	49	73.1364
coatR223H scaffold (and decoration) TcaP	50	47.9157	1.09178	50.1146
coatR223H scaffold (and decoration) TcaP	50	52.3136
