# Supplementary material for: A Vibrio cholerae viral satellite maximizes its spread and inhibits phage by remodeling hijacked phage coat proteins into small capsids
Source: eLife. 2024 Jan 11;12:RP87611. doi: 10.7554/eLife.87611 (PMC10945586; doi:10.7554/eLife.87611)
Supplement: Figure 4—source data 1. [file elife-87611-fig4-data1.xlsx]

## Sheet: Sheet1
		Figure 4–Source data 1. Cryo EM data collection parameters
		EMDB ID	EMD-29675
		Magnification	64000
		Voltage (keV)	300
		Electron exposure (e–/Å2)	36.41
		Defocus range (μm)	0.7 – 2.00
		Pixel size (Å)	0.664
		Symmetry imposed	I
		Number of micrographs	16270
		Final particle images (no.)	379643
		Map resolution (Å)	3.4
		FSC threshold	0.143
