# Supplementary material for: A Vibrio cholerae viral satellite maximizes its spread and inhibits phage by remodeling hijacked phage coat proteins into small capsids
Source: eLife. 2024 Jan 11;12:RP87611. doi: 10.7554/eLife.87611 (PMC10945586; doi:10.7554/eLife.87611)
Supplement: Figure 4—source data 2. [file elife-87611-fig4-data2.xlsx]

## Sheet: Sheet1
		Figure 4–Source data 2. Reconstruction model parameters
		Model	8G1R
		Composition (#)
		Chains	5
		Atoms	9896 (Hydrogens: 0)
		Residues	Protein: 1457 Nucleotide: 0
		Water	0
		Ligands	0
		Bonds (RMSD)
		Length (Å) (σ > 4Å)	0.003 (0)
		Angles (°) (σ > 4Å)	0.571 (2)
		MolProbity score	1.85
		Clash score	6.18
		Ramachandran plot (%)
		Outliers	0.55
		Allowed	8.03
		Favored	91.42
		Rama-Z (Ramachandran plot Z-score, RMSD)
		whole (N = 1821)	-1.97 (0.21)
		helix (N = 432)	0.18 (0.26)
		sheet (N = 415)	-1.32 (0.28)
		loop (N = 974)	-2.30 (0.21)
		Rotamer outliers (%)	0.12
		Cβ outliers (%)	0
		Peptide plane (%)
		Cis proline/general	0.0/0.0
		Twisted proline/general	0.0/0.0
		CaBLAM outliers (%)	6.07
		ADP (B-factors)
		Iso/Aniso (#)	9896/0
		min/max/mean
		Protein	24.90/133.50/55.68
		Nucleotide	---
		Ligand	---
		Water	---
		Occupancy
		Mean	1
		occ = 1 (%)	100
		0 < occ < 1 (%)	0
		occ > 1 (%)	0
		Data
		Lengths (Å)	115.54, 160.69, 120.85
		Angles (Å)	90,90,90
		Supplied Resolution (Å)	3.4
		Resolution Estimates (Å)	Masked	Unmasked
		d FSC (half maps; 0.143)	---	---
		d 99 (full/half1/half2)	3.5/---/---	3.4/---/---
		d model	3.4	3.4
		d FSC model (0/0.143/0.5)	3.0/3.1/3.4	3.0/3.2/3.2
		Map min/max/mean	-1.04/2.21/0.06
		Model vs. Data
		CC (mask)	0.82
		CC (box)	0.47
		CC (peaks)	0.18
		CC (volume)	0.8
		Mean CC for ligands	---
