# Supplementary material for: A Vibrio cholerae viral satellite maximizes its spread and inhibits phage by remodeling hijacked phage coat proteins into small capsids
Source: eLife. 2024 Jan 11;12:RP87611. doi: 10.7554/eLife.87611 (PMC10945586; doi:10.7554/eLife.87611)
Supplement: Figure 5—source data 1. [file elife-87611-fig5-data1.xlsx]

## Sheet: 5E
Efficiency of Plaquing
pTcaPPLE1	pTcaPPLE5
0.0182	0.66
0.0379	1.06
0.03	1.03
