# Supplementary material for: A Vibrio cholerae viral satellite maximizes its spread and inhibits phage by remodeling hijacked phage coat proteins into small capsids
Source: eLife. 2024 Jan 11;12:RP87611. doi: 10.7554/eLife.87611 (PMC10945586; doi:10.7554/eLife.87611)
Supplement: Figure 5—source data 2. [file elife-87611-fig5-data2.xlsx]

## Sheet: 5F
Efficiency of Transduction
PLE1 + EV	PLE5 + EV	PLE5 + pTcaPPLE1
100	41.94	802.01
100	27.45	737.97
100	31.75	654.76
