# Supplementary material for: A Vibrio cholerae viral satellite maximizes its spread and inhibits phage by remodeling hijacked phage coat proteins into small capsids
Source: eLife. 2024 Jan 11;12:RP87611. doi: 10.7554/eLife.87611 (PMC10945586; doi:10.7554/eLife.87611)
Supplement: Supplementary file 1. — Phages genetically escaped TcaP’s inhibition. These phages were purified and sequenced. [file elife-87611-supp1.xlsx]

## Sheet: Sheet1
	Supplementary File 1. Escape mutation information
	Phage	Position1	Frequency2	Annotation3	Gene
	1	71515	1	R223H (CGT  CAT)	gp122 (coat)
	2	71483	1	E234K (GAG  AAG)	gp122 (coat)
	1Position in ICP1_2011_Dha_A (accession: MH310933)
	2Percent of reads with the single nucleotide polymorphism (SNP)
	3Resulting amino acid substitution from SNP (bold)
