# Supplementary material for: A Vibrio cholerae viral satellite maximizes its spread and inhibits phage by remodeling hijacked phage coat proteins into small capsids
Source: eLife. 2024 Jan 11;12:RP87611. doi: 10.7554/eLife.87611 (PMC10945586; doi:10.7554/eLife.87611)
Supplement: Supplementary file 2. — ICP1 and PLE procapsid-like-particles were produced, purified, and subjected to mass spectrometry. [file elife-87611-supp2.xlsx]

## Sheet: Sheet1
		Supplemental File 2. Mass spectrometry results of PLPs
	ICP1 PLPs	Replicate	Protein1	Sequence Count2	Spectrum Count3	Sequence Coverage	Molecular Weight4 (kDa)
		1	Coat	11	43	0.221	37.558
			Scaffold	7	9	0.195	39.333
	PLE PLPs5	1	Coat	92	1611	0.614	37.558
			TcaP	54	545	0.584	33.194
		2	Coat	59	953	0.516	37.558
			TcaP	18	156	0.346	33.194
		3	Coat	70	1203	0.614	37.558
			TcaP	24	119	0.44	33.194
		1Protein details are in Key Resources Table
		2Number of unique peptides detected
		3Total number of peptides detected
		4Molecular weight is calculated
		5Replicates 1-3 were also used for cryo-EM
