# Supplementary material for: A Vibrio cholerae viral satellite maximizes its spread and inhibits phage by remodeling hijacked phage coat proteins into small capsids
Source: eLife. 2024 Jan 11;12:RP87611. doi: 10.7554/eLife.87611 (PMC10945586; doi:10.7554/eLife.87611)
Supplement: Supplementary file 3. — Engineered plasmids and strains were constructed using these oligos. [file elife-87611-supp3.xlsx]

## Sheet: Sheet1
	Supplemental File 3. Oligos used in this study
	Source	Identifier	Sequence	Purpose
	This study	CMB211	GGTATATCTCCTTCTTAAAGTTAAACAAAATTATTTCTAG	linear pETDUET his tag (R)1
	This study	CMB212	CATCACCATCATCACCACTAAAG	linear pETDUET his tag (F)2
	This study	CMB213	ATGTATATCTCCTTCTTATACTTAACTAATATACTAAG	linear pETDUET second site (R)
	This study	CMB220	GCAGATCTCAATTGGATATCG	linear pETDUET second site (F)
	This study	CMB215	TTAAGAAGGAGATATACCATGGCACGTATGGGTGATTTTG	clone coat into pETDUET to 6xHis tag (F)
	This study	CMB216	AGTGGTGATGATGGTGATGTGCAACAGTAATGGTCAAGTC	clone coat into pETDUET to 6xHis tag (R)
	This study	CMB218	TATAAGAAGGAGATATACATATGACTACTATTACTACTACTACTAAC	clone TcaP into pETDUET in second site (F)
	This study	CMB221	GATATCCAATTGAGATCTGCTTATTGAATATACTTACTTTCTAGGG	clone TcaP into pETDUET in second site (R)
	This study	CMB225	CATCACCATCATCACCACtagAGCCAGGATCCGAATTCGAGCTCG	add stop to 6xHis in pETDUET (F)
	This study	CMB226	CGAGCTCGAATTCGGATCCTGGCTctaGTGGTGATGATGGTGATG	add stop to 6xHis in pETDUET
	This study	CMB227	TATAAGAAGGAGATATACATATGGATTTAGATAAATATTCCGAAG	clone gp124 into pETDUET in second site (F)
	This study	CMB228	GATATCCAATTGAGATCTGCTTATTTAGCTTGTTTCTTGGCG	clone gp124 into pETDUET in second site (R)
	This study	CMB231	GTCGTGATGGTGGTGCTAAGTACCTGACTCGCCGCCTTGG	introduce E234K mutation into coat in pETDUET (F)
	This study	CMB232	GCGGCGAGTCAGGTACTTAGCACCACCATCACGACCTTCG	introduce E234K mutation into coat in pETDUET (R)
	This study	CMB239	ATGTATATCTCCTTCTTATACTTAAC	linearize pCDFDuet at second site (R)
	This study	CMB240	TATAAGAAGGAGATATACATATGGCACGTATGGGTGATTTTG	clone gp122 into pCDFDuet at second site (F)
	This study	CMB241	GATATCCAATTGAGATCTGCTTATGCAACAGTAATGGTCAAG	clone gp122 into pCDFDuet at second site (R)
	This study	DD26	CCTGCTAAGGAGGTAACAACAAGATGCTTAAAACACGCACCG	clone tcaP (PLE5) into pKL06 (F)
	This study	CMB18	CCTGCTAAGGAGGTAACAACAAGATGACTACTACTACCAACATTTTCG	clone tcaP (PLE5_2017) into pKL06 (F)
	This study	KS964	CCTGCTAAGGAGGTAACAACAAGATGACTACTATTACTACTACTACTAAC	clone tcaP (PLE1) into pKL06
	This study	DD31	GCGTTTCACTTCTGAGTTCGTTATTGAATATACTTACTTTCTAGGG	clone tcaP (PLE1 or PLE5) into pKL06 (R)
	This study	KS381	GGTCGACGGATCCCCGGAATAGTAGTAATAGTAGTCATAGTTCATTTTTCC	delete tcaP from PLE1 (R)
	This study	KS382	CGAAGCAGCTCCAGCCTACATAACTCACATACTTTAGGGGAGC	delete tcaP from PLE1 (F)
	9	KS587	ATTCCGGGGATCCGTCGACC	amplify frt-specR cassette to delete tcaP from PLE1 (F)
	9	KS586	TGTAGGCTGGAGCTGCTTCG	amplify frt-specR cassette to delete tcaP from PLE1 (R)
	1R indicates reverse primer
	2F indicates forward primer
